# Supplementary material
Source: Research Square preprint supplement (doi:10.21203/rs.3.rs-8252227/v1)
Supplement: Supplementary file 1 [file c20cd5f3d069eeb24f8130aa.pdf]

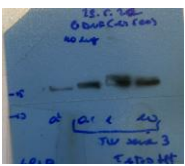

GDNF

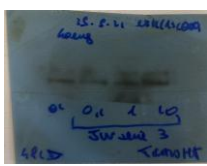

ERK

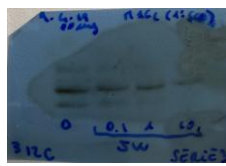

MAGL

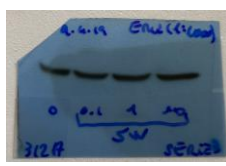

ERK

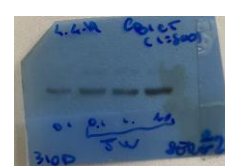

CB1

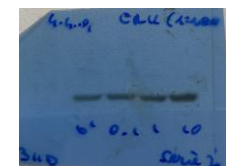

ERK

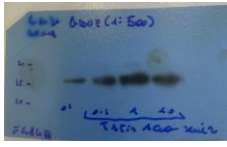

GDNF

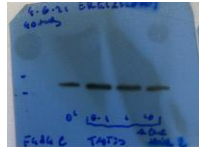

ERK

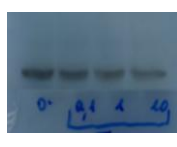

MAGL

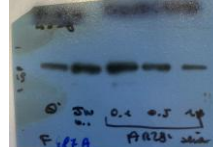

GDNF

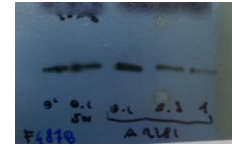

ERK

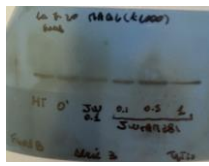

MAGL

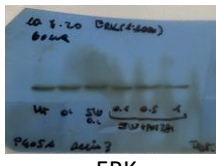

ERK

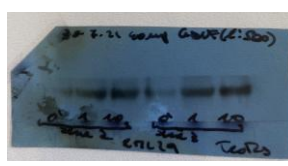

GDNF

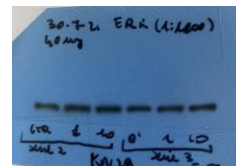

ERK

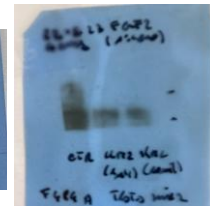

FGF2

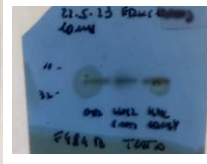

ERK

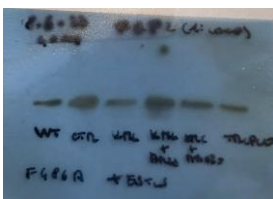

FGF2

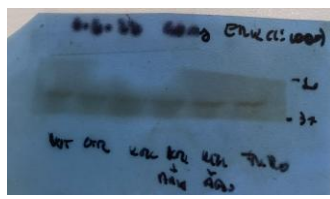

ERK

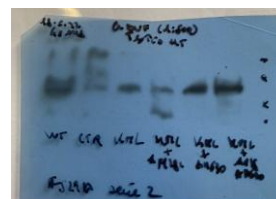

GDNF

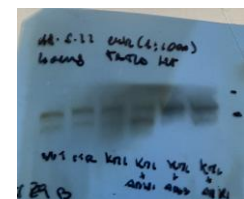

ERK

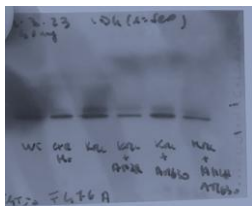

ID4

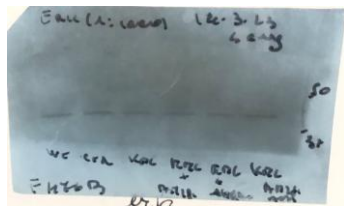

ERK

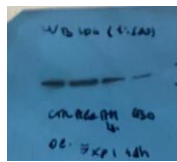

ID4

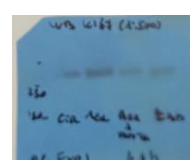

ki67

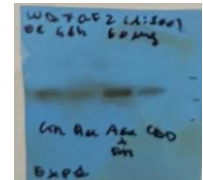

FGF2

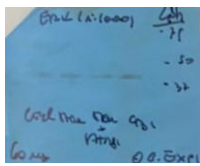

ERK

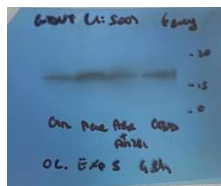

GDNF

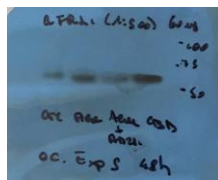

GFRA1

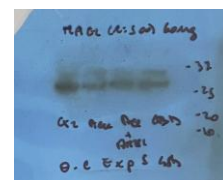

MAGL

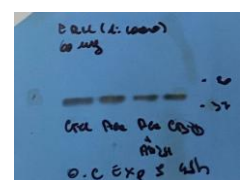

ERK
